# Supplementary material for: Direct characterization of the native structure and mechanics of cyanobacterial carboxysomes
Source: PubMed Central journal article supplement (PMC5708340; doi:10.1039/c7nr02524f), 2017-06-08
Supplement: NR-009-C7NR02524F-s001.pdf [file NR-009-C7NR02524F-s001.pdf]

## Supporting Information

### Direct characterization of the native structure and mechanics of cyanobacterial carboxysomes

Matthew Faulkner,<sup>a</sup> Jorge Rodriguez-Ramos,<sup>a</sup> Gregory F. Dykes,<sup>a</sup> Sian V. Owen,<sup>a</sup> Selene Casella,<sup>a</sup> Deborah M. Simpson,<sup>a</sup> Robert J. Beynon<sup>a</sup> and Lu-Ning Liu<sup>a,\*</sup>

<sup>a</sup>Institute of Integrative Biology, University of Liverpool, Liverpool L69 7ZB, United Kingdom. E-mail: luning.liu@liverpool.ac.uk.

**Table S1** Proteomic results of isolated  $\beta$ -carboxysomes from Syn7942. The column of Normalized amount displays the amount of each of the carboxysomal proteins detected in isolated  $\beta$ -carboxysomes using mass spectroscopy, normalized against the amount of the least abundant protein CcmL.

| Protein | Normalized amount (fmol) |
|---------|--------------------------|
| RbcL    | 4530.8 $\pm$ 432.8       |
| RbcS    | 1744.5 $\pm$ 765.1       |
| CcmM    | 1567.1 $\pm$ 412.8       |
| CcmK2   | 116.6 $\pm$ 22.0         |
| CcaA    | 81.8 $\pm$ 12.6          |
| CcmK4   | 18.7 $\pm$ 0.4           |
| CcmL    | 1                        |

**Table S2** Comparison of the dimensions of isolated carboxysomes from different species using TEM.

| Type                  | Species                                | Diameter (nm)      | Range (nm) | Reference  |
|-----------------------|----------------------------------------|--------------------|------------|------------|
| $\alpha$ -carboxysome | <i>Halothiobacillus neapolitanus</i>   | 117.3 $\pm$ 6.9    | 97 – 132   | 1          |
| $\alpha$ -carboxysome | <i>Halothiobacillus neapolitanus</i>   | 100                | 88 – 108   | 2          |
| $\alpha$ -carboxysome | <i>Halothiobacillus neapolitanus</i>   | 134 $\pm$ 8        | 116 – 169  | 3          |
| $\alpha$ -carboxysome | <i>Synechococcus</i> WH8102            | 123 $\pm$ 5        | 114 – 137  | 4          |
| $\alpha$ -carboxysome | <i>Prochlorococcus marinus</i> MED4    | 90                 | 70 – 100   | 5          |
| $\beta$ -carboxysome  | <i>Synechococcus elongatus</i> PCC7942 | 149.90 $\pm$ 13.78 | 100 – 200  | This study |

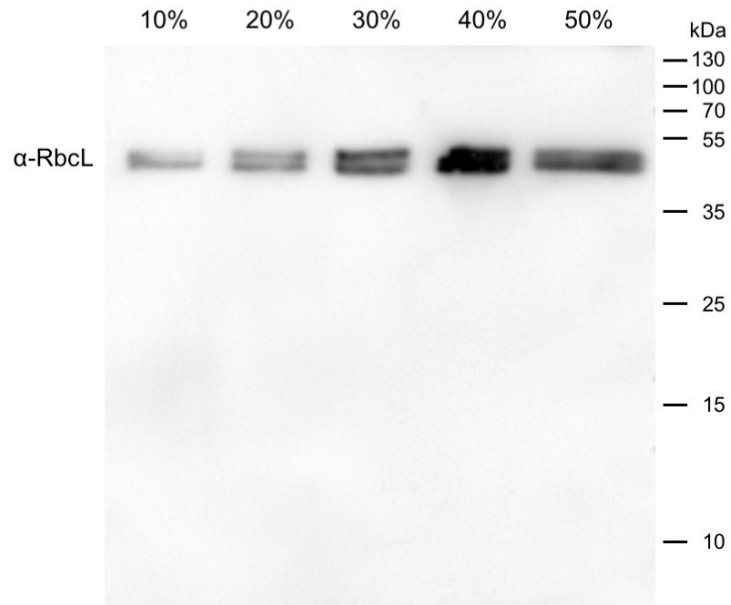

**Fig. S1** Immunoblotting analysis of different  $\beta$ -carboxysome fractions using anti-RbcL antibody. Immunoblotting assays were carried out on the SDS-PAGE gel shown in Fig. 1C. RbcL (~50 kDa) was detected in all sucrose fractions and was most abundant in the 40 % sucrose fraction.

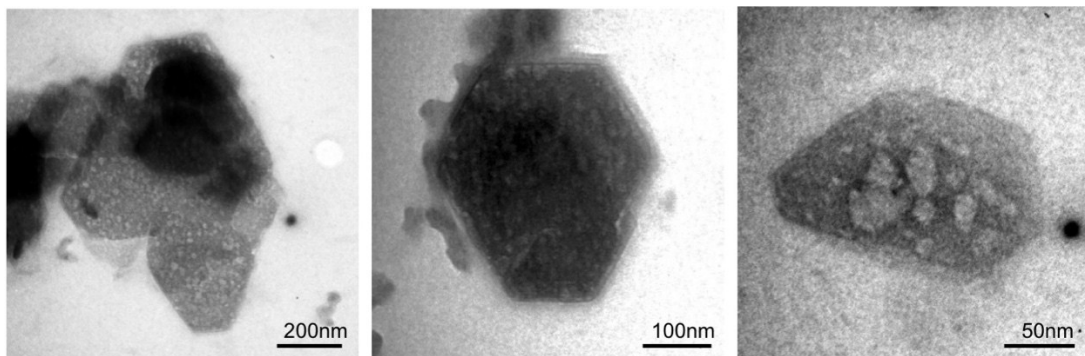

**Fig. S2** TEM images of partial  $\beta$ -carboxysome fragments in the 20 and 30% sucrose fractions.

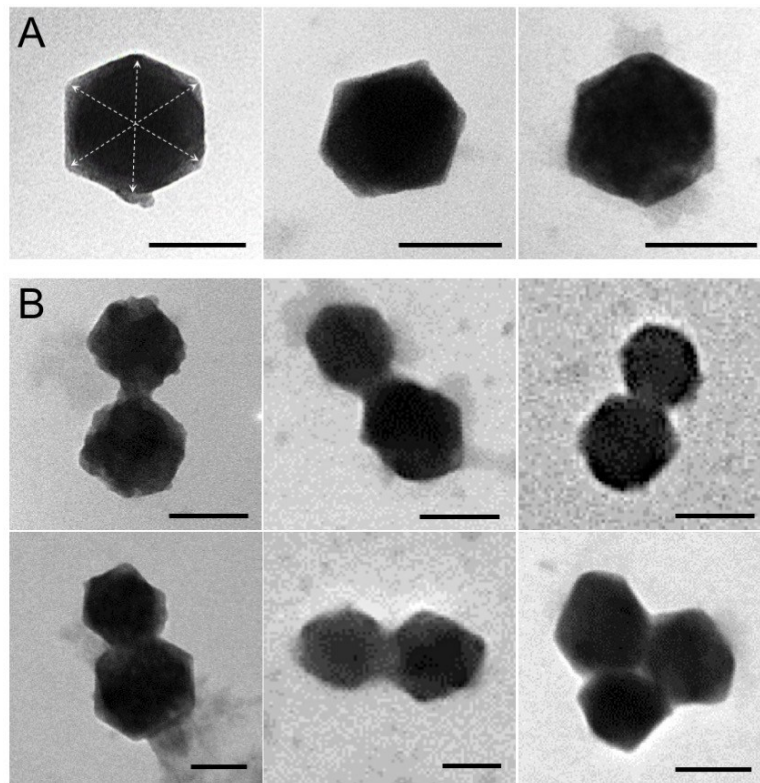

**Fig. S3** TEM images of intact  $\beta$ -carboxysomes in the 40% sucrose fraction. (A) TEM images of individual intact  $\beta$ -carboxysomes. The dashed arrows represent the vertex-to-vertex measurements for determining the  $\beta$ -carboxysome diameter as described in Fig. 4B. (B) TEM images of  $\beta$ -carboxysome aggregations (Fig. 4C). Scale bar: 100 nm.

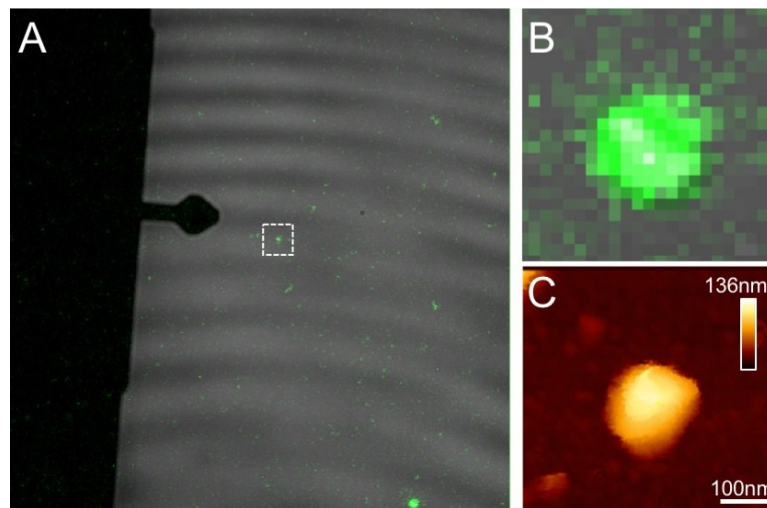

**Fig. S4** Combined confocal and AFM imaging of  $\beta$ -carboxysomes fused with GFP. (A) A merged image of the transmitted and GFP channels captured using a hybrid JPK AFM-Zeiss 880 confocal microscope. The white dashed square represents a  $10 \times 10 \mu\text{m}$  field of view of AFM after the engage. (B) Fluorescence image of a single  $\beta$ -carboxysome in the view highlighted by the white square in panel A. (C) AFM topograph of the same  $\beta$ -carboxysome captured simultaneously with the fluorescence image (B). The combination of AFM-confocal fluorescence imaging ensures the identification of  $\beta$ -carboxysomes on AFM substrate.

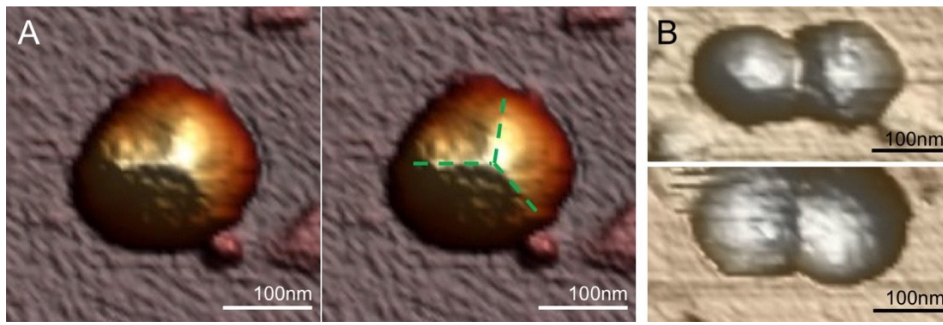

**Fig. S5** AFM images of intact  $\beta$ -carboxysomes. (A) AFM topograph of single  $\beta$ -carboxysome with a vertex and three facet boundaries resolved, indicated by the green dashed lines. (B) AFM topographs of aggregated  $\beta$ -carboxysomes, reminiscent of EM results (Fig. 4C, Fig. S3B).

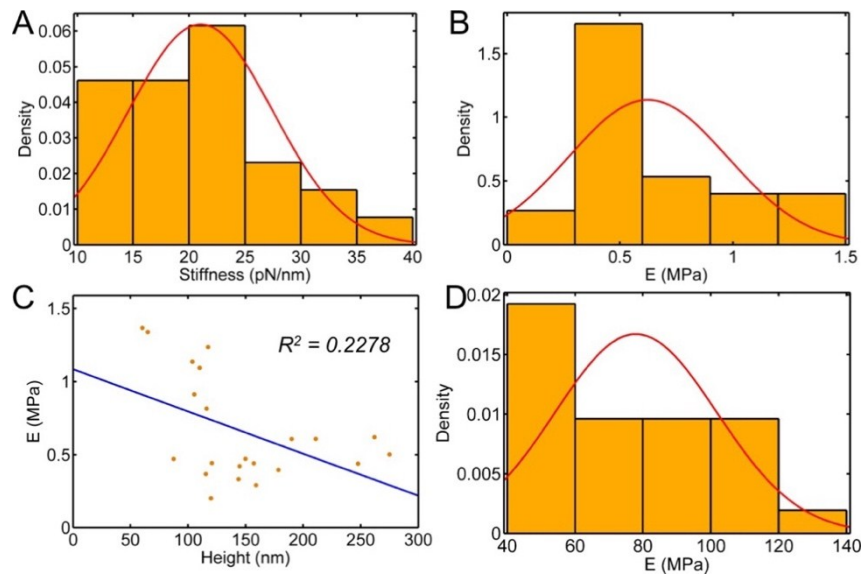

**Fig. S6** Statistical analysis of the nanomechanical properties of  $\beta$ -carboxysomes. (A) Histogram of the  $\beta$ -carboxysome stiffness ( $k_{CB}$ ,  $n = 25$ , Equation 1). (B) Histogram of Young's moduli of  $\beta$ -carboxysomes ( $E_H$ ,  $n = 20$ ) using the Hertzian model (Equation 3). (C) There is no correlation between Young's moduli and the carboxysome diameter ( $y = -0.0039x + 1.1$ ,  $R^2 = 0.2278$ ). (D) Histogram of Young's moduli of  $\beta$ -carboxysomes ( $E_S$ ,  $n = 25$ ) using the thin shell model (Equation 2).

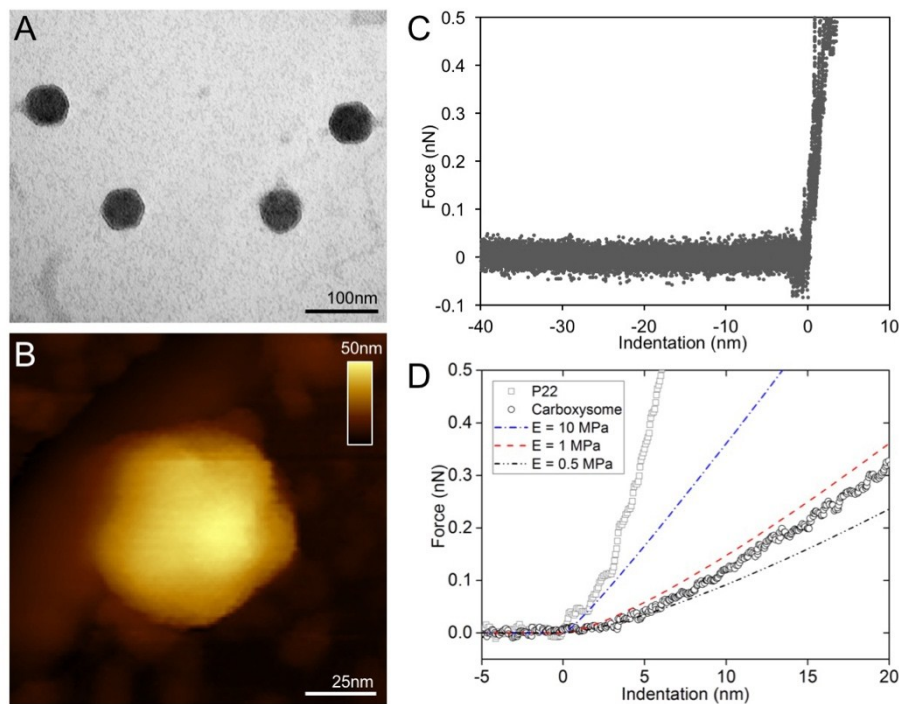

**Fig. S7** Characterization of P22 particles. (A) TEM images of isolated P22 bacteriophage. (B) AFM topograph of a single P22 bacteriophage. The average height is  $65.1 \pm 5.9$  nm ( $n = 20$ ), in good agreement with previous AFM data.<sup>6</sup> (C) Force-indentation curves of individual P22 particles. (D) The force-indentation curves of a single  $\beta$ -carboxysome (circle), a single P22 particle (square) and simulated force-indentation curves (colored dash lines) using a Hertz contact model in a sample with Young's moduli of 0.5, 1 and 10 MPa. The height of P22 particles is  $65.1 \pm 5.9$  nm ( $n = 20$ ) and the spring constant of P22 is approximately  $192.38 \pm 63.77$  pN/nm ( $n = 8$ ). Young's moduli of P22 fitted to the linear model and the Hertzian model are  $101.04 \pm 32.29$  MPa and  $11.06 \pm 8.77$  respectively ( $n = 8$ ). Young's modulus of  $\beta$ -carboxysomes obtained using the Hertzian model ( $E_H = 0.59 \pm 0.34$  MPa,  $n = 20$ ) is significantly lower than those of P22, demonstrating the mechanical softness of  $\beta$ -carboxysome structures compared with P22.

#### Supporting References

1. Y. A. Holthuijzen, J. F. L. van Breemen, W. N. Konings and E. F. J. van Bruggen, *Archives of Microbiology*, 1986, **144**, 258-262.
2. M. F. Schmid, A. M. Paredes, H. A. Khant, F. Soyer, H. C. Aldrich, W. Chiu and J. M. Shively, *J Mol Biol*, 2006, **364**, 526-535.
3. C. V. Iancu, D. M. Morris, Z. Dou, S. Heinhorst, G. C. Cannon and G. J. Jensen, *J Mol Biol*, 2010, **396**, 105-117.
4. C. V. Iancu, H. J. Ding, D. M. Morris, D. P. Dias, A. D. Gonzales, A. Martino and G. J. Jensen, *J Mol Biol*, 2007, **372**, 764-773.
5. E. W. Roberts, F. Cai, C. A. Kerfeld, G. C. Cannon and S. Heinhorst, *J Bacteriol*, 2012, **194**, 787-795.
6. A. Llauro, D. Luque, E. Edwards, B. L. Trus, J. Avera, D. Reguera, T. Douglas, P. J. Pablo and J. R. Caston, *Nanoscale*, 2016, **8**, 9328-9336.
